# Supplementary material
Source: publisher figshare collection journal article supplement (https://frontiersin.figshare.com/ndownloader/files/24688274)
Supplement: Supplementary file 1 [file 24688274]

## Sheet: Ningaloo observations
ID	L1	L2	T1	T2	dL	delta_t	SEX
1	5.44016	6.89224	2009-05-08	2019-05-02	1.45208	9.9822	M
2	7.07824	7.91141	2009-05-05	2019-05-04	0.833178	9.99589	M
3	7.92882	8.97736	2009-05-07	2019-05-08	1.04854	10.0014	M
5	4.80929	8.02889	2009-05-07	2016-05-03	3.21959	6.98973	M
6	8.23881	8.514	2009-05-05	2016-05-03	0.275188	6.99521	M
7	3.70093	4.8974	2009-05-02	2013-05-12	1.19647	4.02738	M
10	3.99569	5.17694	2009-05-07	2012-05-07	1.18124	3.00068	F
16	5.70447	6.13302	2013-05-16	2019-05-04	0.428554	5.96578	M
19	5.7606	6.82589	2010-06-20	2019-05-03	1.06529	8.8679	M
22	6.07864	6.82589	2012-05-07	2019-05-04	0.74725	6.98973	M
23	8.13222	8.56838	2012-05-03	2016-05-05	0.436168	4.00548	M
24	5.79257	7.02711	2012-05-06	2019-05-05	1.23454	6.99521	M
25	7.37191	7.6384	2012-05-06	2019-05-08	0.266486	7.00342	M
26	5.99706	6.1439	2016-05-05	2019-05-10	0.146839	3.01164	M
27	6.07646	6.54526	2012-05-06	2019-05-10	0.468799	7.0089	M
28	5.82194	7.29795	2012-05-07	2019-05-11	1.47601	7.0089	M
30	7.25662	7.91141	2012-05-02	2019-05-04	0.654795	7.00342	M
32	4.67659	6.44737	2013-05-16	2019-05-04	1.77078	5.96578	M
33	4.67007	7.26097	2013-05-16	2018-05-22	2.5909	5.01574	M
34	8.16485	8.18008	2012-05-06	2018-05-22	0.0152278	6.04244	M
36	5.93724	6.0819	2016-04-27	2017-05-02	0.144664	1.013	M
40	6.68014	8.04085	2012-05-02	2017-04-29	1.36071	4.9911	F
42	3.65416	4.83975	2012-05-02	2016-05-03	1.18559	4.00274	M
46	5.39121	5.48911	2012-05-06	2013-05-10	0.097893	1.01027	F
49	5.9579	6.45498	2013-05-15	2019-05-05	0.497079	5.97125	M
53	6.56484	6.94336	2013-05-15	2017-05-02	0.37852	3.96441	M
54	5.89264	6.56919	2013-05-06	2016-05-02	0.676549	2.98973	M
55	5.587	6.21701	2013-05-06	2016-05-03	0.630007	2.99247	M
56	5.97096	6.21678	2013-05-06	2016-04-27	0.24582	2.97604	M
57	5.73601	6.49632	2013-05-16	2016-04-28	0.760302	2.9514	M
59	6.68884	6.79	2017-05-03	2019-05-07	0.101156	2.00958	M
61	5.76321	5.79801	2015-05-07	2017-05-02	0.0348064	1.98768	M
67	7.01515	7.18483	2015-05-07	2017-05-01	0.169681	1.98494	M
68	6.7628	6.97164	2016-04-29	2019-05-03	0.208838	3.0089	M
69	6.57354	7.0369	2016-05-01	2019-05-10	0.46336	3.02259	M
70	4.80168	5.52282	2016-05-01	2019-05-07	0.721145	3.01437	M
71	5.42493	5.92962	2016-04-28	2018-05-06	0.504693	2.02053	M
74	6.07429	6.22874	2016-04-27	2017-04-28	0.154453	1.00205	M
75	6.13738	6.34404	2016-04-27	2017-04-30	0.206663	1.00753	F
76	6.46586	6.56484	2016-05-02	2017-05-05	0.0989807	1.00753	M
77	6.11345	6.74866	2017-05-05	2019-05-09	0.635217	2.00958	M
78	5.32595	5.69577	2017-05-05	2019-05-10	0.369818	2.01232	M
79	5.18237	5.34227	2017-04-28	2019-05-02	0.159892	2.00958	M
80	5.58809	5.72079	2017-04-28	2019-05-10	0.132699	2.03149	M
81	6.57354	6.62684	2017-04-28	2019-05-02	0.0532973	2.00958	M
82	4.47319	5.44777	2017-05-11	2019-05-11	0.974579	1.99863	M
83	5.1628	5.6751	2017-05-03	2019-05-11	0.512307	2.02053	F
84	7.13697	7.27293	2017-05-01	2019-05-07	0.135963	2.01506	M
85	4.85933	5.39991	2017-05-02	2019-05-10	0.540587	2.02053	M
86	7.00862	7.311	2017-05-06	2019-05-07	0.302381	2.00137	M
88	6.71821	6.67035	2017-04-29	2018-05-18	-0.0478588	1.05133	F
89	4.79298	5.30637	2017-05-01	2018-05-20	0.513394	1.05133	M
90	6.07429	6.48979	2017-04-30	2018-05-20	0.415501	1.05407	M
91	7.435	7.14132	2017-04-30	2018-05-22	-0.293679	1.05955	M

## Sheet: Aquaria observations
L1	L2	dL	delta_t	SEX	Source
4.67	6.64	1.97	11.37	M	Georgia Aquarium
4.13	6.43	2.3	11.38	M	Georgia Aquarium
4.7	8.21	3.51	12.31	F	Georgia Aquarium
4.22	7.22	3	12.33	F	Georgia Aquarium
0.6	3.7	3.1	3.17	M	Nishida (2001
4.19	7.64	3.45	8	F	Wintner (2000)
4.73	5.71	0.98	3	M	Wintner (2000)
0.6	1.4	0.8	0.33	NA	Chang et al. (1997)
3.65	5.3	1.65	5.63	F	Uchida et al. (2000)
4.5	5.1	0.6	2.85	M	Uchida et al. (2000)
4.85	5.2	0.35	1.25	M	Uchida et al. (2000)
